# Supplementary material for: Agro-Environmental Determinants of Avian Influenza Circulation: A Multisite Study in Thailand, Vietnam and Madagascar
Source: PubMed Central journal article supplement (PMC4100877; doi:10.1371/journal.pone.0101958), 2014-07-16

Figure S1. Temporal distribution of HPAI H5N1 confirmed outbreaks in lower-Northern Thailand (A), and of percentages (%) of poultry samples taken in the Red River Delta (B) and Vietnam highlands (C).

(A) lower-Northern Thailand (n=1032 villages monitored)

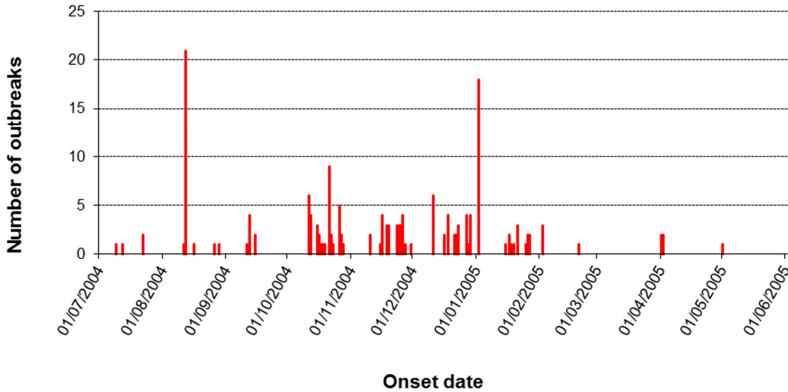

(B) Red River Delta, Vietnam (n=3234 samples)

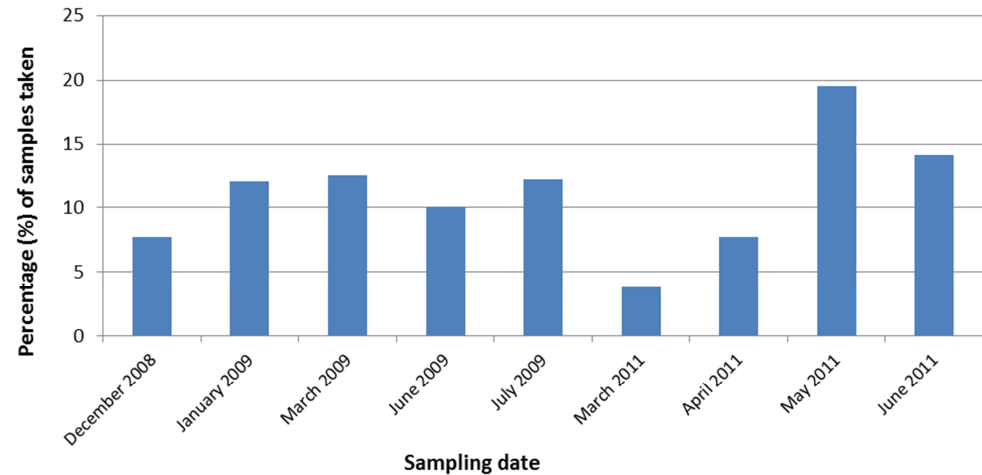

(C) Vietnam highlands (n=1531 samples)

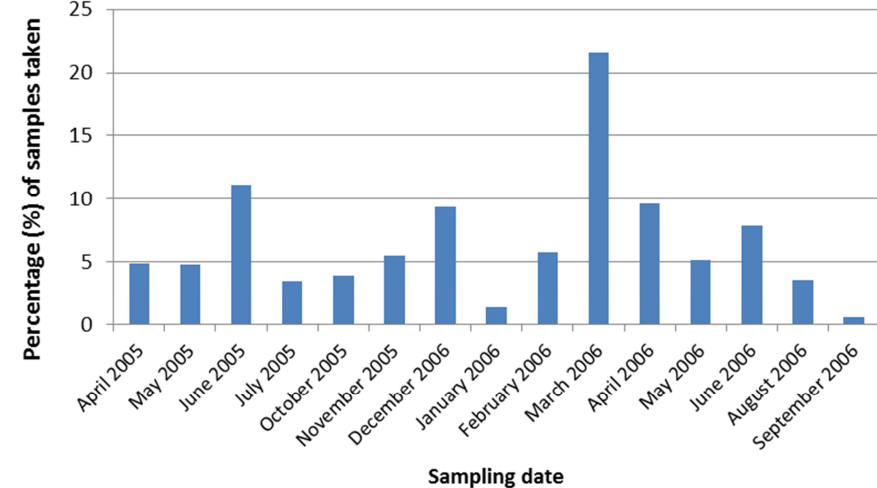

Supplement: pone.0101958.s001.pdf [file pone.0101958.s001.pdf]
