# Supplementary material for: Agro-Environmental Determinants of Avian Influenza Circulation: A Multisite Study in Thailand, Vietnam and Madagascar
Source: PubMed Central journal article supplement (PMC4100877; doi:10.1371/journal.pone.0101958), 2014-07-16
Supplement: pone.0101958.s005.pdf [file pone.0101958.s005.pdf]

**Supplementary Material S1. Description of the spatial generalized linear model used to study the effect of agro-environmental determinants on avian influenza circulation.**

The statistical analysis was based on spatial generalized linear mixed models, which were run using the MASS package of the R software. The spatial dependency between observations was accounted for by introducing a correlation structure in the models.

Formally, if  $Y_i$  and  $Y_j$  are the observations of the response variable at location  $i$  and  $j$ , the model can be written as:

$$\begin{cases} \log\left(\frac{E(Y_i)}{1 - E(Y_i)}\right) = x_i \beta \\ \text{corr}(Y_i, Y_j) = \exp\left(-\frac{d_{ij}}{r}\right) \end{cases}$$

where  $E(Y_i) = P(Y_i = 1)$  is the expectation of  $Y_i$ ,  $\beta$  is the coefficients for fixed effects,  $x_i$  is the explanatory variables for the  $i$ -th observation,  $\text{corr}(Y_i, Y_j)$  is the correlation between  $Y_i$  and  $Y_j$ ,  $d_{ij}$  is the Euclidian distance between locations  $i$  and  $j$ , and  $r$  is the range of the spatial correlation estimated from the data.
